# Supplementary material for: Discovery of an unusually high number of de novo mutations in sperm of older men using duplex sequencing
Source: Genome Res. 2022 Mar;32(3):499–511. doi: 10.1101/gr.275695.121 (PMC8896467; doi:10.1101/gr.275695.121)
Supplement: Supplemental Material [file supp_gr.275695.121_Supplemental_Table_S1.xlsx]

## Sheet: Table S1
			Variant Number	Variant Position	CDS Substitution	Amino Acid Substitution	n	VAF	CI Lower Limit	CI Upper Limit	FGFR3 domain	Domain Class [0,1,2]	Median VAF per Domain	Substitution Type	Donors Age	gnomAD	COSMIC	Germline Disorder	Sequence Context	CpG Variant	Tier	Library	Existing Variation	SIFT_score	SIFT_score: deleterious (<0.05), tolerated (>=0.05)	Polyphen2_HDIV_score	Polyphen2_HDIV_score: probably damaging (>0.95), possible damaging (>0.5), benign (<=0.5)	Polyphen2_HVAR_score	Polyphen2_HVAR_score: probably damaging (>0.95), possible damaging (>0.5), benign (<=0.5)	CADD_raw	GERP++ RS score
			1	chr4:1799439	c.295G>A	p.A99T	1	0.000336361	8.51591e-06	0.00187408	IgI	0	0.000235711	missense_variant	Younger	4.33e-06	1	-	TGC	non_cpg_transition	1.1	FGFR3 Up Y Oct19	rs759815430,COSV53399900	0.11	T	0.032	B	0.086	B	3395	3.45
			2	chr4:1799515	c.371G>A	p.R124Q	1	0.000135062	3.41948e-06	0.000752518	IgI	0		missense_variant	Older	6.46e-05	-	-	CGG	cpg_transition	1.1	FGFR3 Up O Oct19 Re-seq	rs774749538	0.171	T	0.933	P	0.469	P	4984	3.45
			3	chr4:1799784	c.417C>T	p.D139D	1	0.000461894	1.16941e-05	0.00257351	Inter-domain	0		synonymous_variant	Older	0.0392	-	CS	ACG	cpg_transition	1.1	FGFR3 Up O Oct19	rs3135867	.	.	.	.	.	.	.	.
			4	chr4:1799800	c.433G>T	p.G145C	1	0.000187021	4.73496e-06	0.00104201	Inter-domain	0		missense_variant	Younger	-	-	-	AGG	non_cpg_transversion	1.2	FGFR3 Up Y Aug19	-	0.013	D	0.935	P	0.753	P	3832	3.45
			5	chr4:1801371	c.450C>T	p.A150A	1	0.000109075	2.76154e-06	0.000607727	Inter-domain	0		synonymous_variant	Younger	6.51e-06	-	-	CCC	non_cpg_transition	1.1	FGFR3 Up Y Aug19	rs1002595049	.	.	.	.	.	.	.	.
			6	chr4:1801383	c.462A>T	p.T154T	1	5.6057e-05	1.41924e-06	0.000312329	IgII	0	5.6079e-05	synonymous_variant	Younger	-	-	-	CAC	non_cpg_transversion	1.1	FGFR3 Up Y Oct19	-
			7	chr4:1801385	c.464G>T	p.R155L	1	5.60538e-05	1.41916e-06	0.000312312	IgII	0		missense_variant	Younger	-	-	-	CGG	cpg_transversion	1.1	FGFR3 Up Y Oct19	-	0.021	D	0.583	P	0.325	B	5145	3.67
							1	3.97757e-05	1.00703e-06	0.000221616					Older						2.4	FGFR3 Up O Oct19 Re-seq	-
			8	chr4:1801390	c.469G>A	p.E157K	1	0.000110424	2.79569e-06	0.000615243	IgII	0		missense_variant	Younger	6.51e-06	1	-	CGA	cpg_transition	1.1	FGFR3 Up Y Aug19	rs1330260382,COSV99037978	0.07	T	0.933	P	0.473	P	5207	3.67
							1	5.6079e-05	1.4198e-06	0.000312452					Younger						2.1	FGFR3 Up Y Oct19	rs1330260382,COSV99037978
			9	chr4:1801410	c.489G>T	p.L163L	1	7.83453e-05	1.98353e-06	0.000436512	IgII	0		synonymous_variant	Older	-	-	-	TGC	non_cpg_transversion	1.1	FGFR3 Up O Oct19	-
			10	chr4:1801661	c.657G>A	p.V219V	1	0.000224517	5.68429e-06	0.00125093	IgII	0		synonymous_variant	Younger	-	-	-	TGC	non_cpg_transition	1.2	FGFR3 Up Y Aug19	-
			11	chr4:1801844	c.749C>G	p.P250R	1	7.59936e-05	1.92399e-06	0.000423409	Inter-domain	0		missense_variant	Older	7.4e-06	-	ACH, CS, CZS, MS, SCS	CCG	cpg_transversion	1.1	FGFR3 Up O Oct19	rs4647924,CM022207,CM960655,COSV53402284,COSV53409935	0.029	D	0.99	D	0.907	P	3058	3.09
			12	chr4:1801873	c.778C>A	p.P260T	1	5.527e-05	1.39932e-06	0.000307945	IgIII	0	5.5534e-05	missense_variant	Younger	-	-	-	GCC	non_cpg_transversion	1.1	FGFR3 Up Y Oct19	-	0	D	0.998	D	0.957	D	5717	3.94
			13	chr4:1801936	c.841G>T	p.A281S	1	5.28123e-05	1.33709e-06	0.000294251	IgIII	0		missense_variant	Younger	-	1	-	CGC	cpg_transversion	1.1	FGFR3 Up Y Oct19	COSV53394447	0.071	T	0.87	P	0.746	P	4.48	3.94
							1	3.09962e-05	7.84756e-07	0.0001727					Older						1.1	FGFR3 Up O Oct19 Re-seq	COSV53394447
			14	chr4:1801952	c.857A>T	p.Q286L	1	7.17051e-05	1.81542e-06	0.000399515	IgIII	0		missense_variant	Younger	-	-	-	CAG	non_cpg_transversion	1.1	FGFR3 Up Y Aug19	-	0.001	D	0.722	P	0.755	P	4.196	3.94
			15	chr4:1801964	c.869A>T	p.H290L	1	5.26565e-05	1.33315e-06	0.000293383	IgIII	0		missense_variant	Younger	-	-	-	CAC	non_cpg_transversion	1.2	FGFR3 Up Y Oct19	-	0.019	D	0.942	P	0.905	P	4604	4
			16	chr4:1801965	c.870C>T	p.H290H	1	5.26039e-05	1.33182e-06	0.00029309	IgIII	0		synonymous_variant	Younger	2.41e-05	-	-	ACG	cpg_transition	1.1	FGFR3 Up Y Oct19	rs370518637	.	.	.	.	.	.	.	.
			17	chr4:1801966	c.871G>A	p.V291M	1	3.09157e-05	7.82718e-07	0.000172251	IgIII	0		missense_variant	Older	4.01e-06	-	-	CGT	cpg_transition	1.2	FGFR3 Up O Oct19 Re-seq	rs1004751192	0.002	D	0.331	B	0.197	B	3234	4
			18	chr4:1802001	c.906C>A	p.G302G	1	3.10049e-05	7.84975e-07	0.000172748	IgIII	0		synonymous_variant	Older	-	-	-	GCA	non_cpg_transversion	1.1	FGFR3 Up O Oct19 Re-seq	-
			19	chr4:1802003	c.908C>T	p.T303I	1	7.54774e-05	1.91092e-06	0.000420533	IgIII	0		missense_variant	Older	-	-	-	ACA	non_cpg_transition	1.1	FGFR3 Up O Oct19	-	0.221	T	0.022	B	0.086	B	2553	4
			20	chr4:1803694	c.933G>A	p.T311T	1	4.47668e-05	1.1334e-06	0.000249424	IgIII	0		splice_region_variant	Older	0.000135	-	-	CGG	cpg_transition	1.1	FGFR3 Up O Oct19 Re-seq	rs142805104	.	.	.	.	.	.	2436	1.35
			21	chr4:1803701	c.940G>A	p.A314T	1	4.94511e-05	1.25199e-06	0.000275524	IgIII	0		missense_variant	Older	2.13e-05	1	-	CGC	cpg_transition	1.1	FGFR3 Down O 2Cap	rs748488719,COSV53423674	0.115	T	0.006	B	0.007	B	2633	4.29
			22	chr4:1803707	c.946A>T	p.T316S	1	4.96475e-05	1.25697e-06	0.000276618	IgIII	0		missense_variant	Older	-	-	-	CAC	non_cpg_transversion	1.1	FGFR3 Down O 2Cap	-	0.445	T	0.001	B	0.016	B	2491	4.28
			23	chr4:1803712	c.951C>T	p.T317T	1	0.000162338	4.11003e-06	0.000904488	IgIII	0		synonymous_variant	Younger	3.2e-05	-	-	CCG	cpg_transition	1.1	FGFR3 Down Y Ad2	rs368192848	.	.	.	.	.	.	.	.
			24	chr4:1803713	c.952G>A	p.D318N	1	8.76271e-05	2.21853e-06	0.000488227	IgIII	0		missense_variant	Younger	3.99e-06	1	-	CGA	cpg_transition	1.1	FGFR3 Up Y Oct19	rs771975162,COSV53424228	0.263	T	0.9	P	0.501	P	2609	3.44
							1	4.9965e-05	1.26501e-06	0.000278387					Older						1.1	FGFR3 Down O 2Cap	rs771975162,COSV53424228
			25	chr4:1803736	c.975C>T	p.S325S	1	0.000153116	3.87656e-06	0.000853107	IgIII	0		synonymous_variant	Older	3.99e-05	-	-	CCT	non_cpg_transition	1.1	FGFR3 Down O Babsi	rs761511715	.	.	.	.	.	.	.	.
			26	chr4:1803760	c.999C>T	p.D333D	1	0.000138102	3.49645e-06	0.000769458	IgIII	0		synonymous_variant	Younger	2.48e-05	-	-	ACG	cpg_transition	2.4	FGFR3 Down Y Ad3	rs370530264	.	.	.	.	.	.	.	.
							1	7.70179e-05	1.94992e-06	0.000429116					Older						1.1	FGFR3 Down O BAT	rs370530264
			27	chr4:1803761	c.1000G>A	p.A334T	1	0.000124301	3.14702e-06	0.00069256	IgIII	0		missense_variant	Older	3.99e-06	-	CS	CGC	cpg_transition	1.1	FGFR3 Up O Oct19	rs373496046,CM119750	0.002	D	0.966	D	0.785	P	2347	4.29
			28	chr4:1803764	c.1003G>A	p.G335R	1	0.00019685	4.98382e-06	0.00109678	IgIII	0		missense_variant	Younger	3.99e-06	1	-	CGG	cpg_transition	2.1	FGFR3 Up Y Aug19	rs772097747, COSV99600708	0	D	1	D	1	D	2302	4.29
							1	0.000169492	4.29115e-06	0.000944346					Younger						2.4	FGFR3 Down Y Ad2	rs772097747
			29	chr4:1803774	c.1013C>A	p.T338N	1	8.78735e-05	2.22476e-06	0.0004896	IgIII	0		missense_variant	Younger	-	-	-	ACC	non_cpg_transversion	1.2	FGFR3 Up Y Oct19	-	0	D	0.966	D	0.817	P	2417	4.29
			30	chr4:1803786	c.1025G>T	p.G342V	1	0.000142288	3.60242e-06	0.000792778	IgIII	0		missense_variant	Younger	-	1	-	GGC	non_cpg_transversion	1.2	FGFR3 Down Y Ad3	COSV53404328	0.001	D	0.833	P	0.661	P	1936	4.29
			31	chr4:1803798	c.1037G>T	p.G346V	1	5.5534e-05	1.406e-06	0.000309415	IgIII	0		missense_variant	Older	-	-	-	GGG	non_cpg_transversion	1.1	FGFR3 Down O 2Cap	-	0	D	1	D	1	D	1972	4.32
			32	chr4:1803806	c.1045C>A	p.H349N	1	4.64231e-05	1.17533e-06	0.000258653	IgIII	0		missense_variant	Older	-	-	-	TCA	non_cpg_transversion	1.1	FGFR3 Up O Oct19 Re-seq	-	0.203	T	0.372	B	0.312	B	44229	4.46
			33	chr4:1804338	c.1084G>T	p.E362*	1	9.3188e-05	2.35931e-06	0.00051921	Inter-domain	1		stop_gained	Older	-	-	-	GGA	non_cpg_transversion	1.1	FGFR3 Down O Renato	-	.	.	.	.	.	.	10.976	3.82
			34	chr4:1804372	c.1118A>G	p.Y373C	1	0.000315557	7.98921e-06	0.00175817	Inter-domain	1		missense_variant	Older	-	474	MPD, TDI	TAT	non_cpg_transition	2.1	FGFR3 Down O 2Cap	rs121913485,CM960657,COSV53390174	0.002	D	0.992	D	0.94	D	3448	1.93
							3	0.00032338	6.66888e-05	0.000945055					Older						1.1/2.1	FGFR3 Down O Renato	rs121913485,CM960657,COSV53390174
			35	chr4:1804392	c.1138G>A	p.G380R	1	0.00015647	3.96148e-06	0.000871795	TM	1	0.000113766	missense_variant	Older	-	25	ACH, CS, EN	CGG	cpg_transition	2.1	FGFR3 Down O BAT	rs28931614,CM940785,CM940786,CX090489,COSV53399372	0.085	T	0.959	D	0.637	P	5222	3.82
							1	0.000113766	2.8803e-06	0.000633862					Older						1.1	FGFR3 Down O Renato	rs28931614,CM940785,CM940786,CX090489,COSV53399372
			36	chr4:1804436	c.1182G>T	p.T394T	1	7.21917e-05	1.82774e-06	0.000402227	TM	1		synonymous_variant	Older	2.4e-05	-	-	CGC	cpg_transversion	1.1	FGFR3 Down O BAT	rs771495510,COSV53424764	.	.	.	.	.	.	.	.
			37	chr4:1804450	c.1196G>A	p.R399H	1	2.48367e-05	6.28811e-07	0.000138381	Inter-domain	1		missense_variant	Younger	2.49e-05	1	-	CGC	cpg_transition	2.1	FGFR3 Down Y Ad2	rs761896295,COSV53422901	0.064	T	0.029	B	0.031	B	2273	-0.15
							1	3.78158e-05	9.57412e-07	0.000210696					Younger						2.1	FGFR3 Down Y Ad3	rs761896295,COSV53422901
							1	5.97336e-05	1.51232e-06	0.000332814					Older						1.1	FGFR3 Down O BAT	rs761896295,COSV53422901
			38	chr4:1804490	c.1236C>A	p.H412Q	1	2.24643e-05	5.68748e-07	0.000125163	Inter-domain	1		missense_variant	Younger	-	2	-	ACA	non_cpg_transversion	1.1	FGFR3 Down Y Ad2	COSV53405081	0.366	T	0.029	B	0.06	B	1552	3.53
			39	chr4:1804505	c.1251C>T	p.F417F	1	0.00026001	6.58289e-06	0.00144868	Inter-domain	1		synonymous_variant	Younger	-	-	-	TCC	non_cpg_transition	1.1	FGFR3 Down Y 12xExt5xPCR	-
			40	chr4:1804515	c.1261C>T	p.R421*	2	4.4196e-05	5.35234e-06	0.000159651	Inter-domain	1		stop_gained	Younger	-	-		GCG	cpg_transition	2.1/2.4	FGFR3 Down Y Ad2	-	.	.	.	.	.	.	33909	3.59
			41	chr4:1804516	c.1262G>A	p.R421Q	1	2.20726e-05	5.5883e-07	0.000122981	Inter-domain	1		missense_variant	Younger	2.41e-05	1	-	CGA	cpg_transition	2.1	FGFR3 Down Y Ad2	rs587778355,COSV53397919	0.035	D	1	D	0.992	D	7161	4.44
				chr4:1804516	c.1262G>A	p.R421Q	1	5.01731e-05	1.27027e-06	0.000279547					Older						1.1	FGFR3 Down O BAT
			42	chr4:1804829	c.1272C>A	p.S424S	1	2.35605e-05	5.96499e-07	0.00013127	Inter-domain	1		synonymous_variant	Younger	-	-	-	CCC	non_cpg_transversion	1.1	FGFR3 Down Y Ad2	-
			43	chr4:1804843	c.1286C>A	p.A429E	1	2.59014e-05	6.55766e-07	0.000144313	Inter-domain	1		missense_variant	Younger	-	-	-	GCG	cpg_transversion	2.4	FGFR3 Down Y Ad3	-	0.004	D	0.142	B	0.23	B	4705	3.98
							1	3.13342e-05	7.93314e-07	0.000174583					Older		-				2.4	FGFR3 Down O 2Cap	COSV53397900
			44	chr4:1804896	c.1339G>A	p.E447K	1	0.000791139	2.00299e-05	0.00440795	Inter-domain	1		missense_variant	Younger	-	-	-	GGA	non_cpg_transition	1.1	FGFR3 Down Y 5xPCR	-	0.182	T	0.185	B	0.205	B	3443	3.98
			45	chr4:1804906	c.1349C>T	p.T450M	1	8.1248e-05	2.05702e-06	0.000452685	Inter-domain	1		missense_variant	Younger	0.00126	-	-	ACG	cpg_transition	1.2	FGFR3 Down Y Ad3	rs56240927	1	T	0.002	B	0.004	B	0.003	0.613
			46	chr4:1804930	c.1373A>T	p.E458V	1	4.76259e-05	1.20578e-06	0.000265354	Inter-domain	1		missense_variant	Younger	-	-	-	GAG	non_cpg_transversion	1.2	FGFR3 Down Y Ad2	-	0	D	0.945	P	0.835	P	5801	3.96
			47	chr4:1804967	c.1410C>G	p.A470A	1	3.28785e-05	8.32412e-07	0.000183187	Inter-domain	1		splice_region_variant	Older	-	-	-	CCC	non_cpg_transversion	1.1	FGFR3 Down O 2Cap	-
			48	chr4:1805560	c.1536C>T	p.D512D	1	1.54331e-05	3.90731e-07	8.59875e-05	TK	2	2.2312e-05	splice_region_variant	Younger	1.6e-05	-	-	ACG	cpg_transition	2.1	FGFR3 Down Y Ad2	rs754606269	.	.	.	.	.	.	.	.
			58	chr4:1805560	c.1536C>T	p.D512D	1	1.50033e-05	3.79851e-07	8.3593e-05					Younger						2.1	FGFR3 Down Y Ad3
			49	chr4:1805570	c.1546G>T	p.D516Y	1	2.22831e-05	5.6416e-07	0.000124154	TK	2		missense_variant	Older	1.42e-05	-	-	TGA	non_cpg_transversion	1.1	FGFR3 Down O 2Cap	rs779377617	0.004	D	0.318	B	0.343	B	5008	4.88
			50	chr4:1805621	c.1597G>A	p.G533R	1	1.53967e-05	3.89811e-07	8.57849e-05	TK	2		missense_variant	Younger	-	1	-	CGG	cpg_transition	1.1	FGFR3 Down Y Ad2	COSV99037986	0	D	1	D	1	D	5652	4.88
			51	chr4:1805636	c.1612A>G	p.I538V	2	4.45127e-05	5.39069e-06	0.000160795	TK	2		missense_variant	Older	1.42e-05	-	HCH	CAT	non_cpg_transition	1.1	FGFR3 Down O 2Cap	rs80053154,CM970530,COSV53408774	0.016	D	0.014	B	0.115	B	1437	3.69
			52	chr4:1805644	c.1620C>A	p.N540K	1	1.54145e-05	3.90261e-07	8.58841e-05	TK	2		missense_variant	Younger	-	-	ACH, HCH, TDI, CS	ACC	non_cpg_transversion	1.1	FGFR3 Down Y Ad2	rs28933068,CM950474,CM950475	0	D	1	D	1	D	5982	3.15
							1	2.2312e-05	5.6489e-07	0.000124314					Older						1.1	FGFR3 Down O 2Cap	rs28933068,CM950474,CM950475
			53	chr4:1805644	c.1620C>G	p.N540K	2	6.94227e-05	8.40742e-06	0.000250779	TK	2		missense_variant	Older	-	-	ACH, HCH, CS	ACC	non_cpg_transversion	1.1	FGFR3 Down O BAT	rs28933068,CM950474,CM950475	0	D	1	D	1	D	5506	3.15
			54	chr4:1805644	c.1620C>T	p.N540N	1	5.67795e-05	1.43753e-06	0.000316355	TK	2		synonymous_variant	Older	1.6e-05	-	-	ACC	non_cpg_transition	1.1	FGFR3 Down O Renato	rs28933068,CM950474,CM950475	.	.	.	.	.	.	.	.
			55	chr4:1805650	c.1626G>T	p.L542L	1	1.54693e-05	3.9165e-07	8.61896e-05	TK	2		synonymous_variant	Younger	-	-	-	TGG	non_cpg_transversion	1.1	FGFR3 Down Y Ad2	-
			56	chr4:1805751	c.1647G>T	p.G549G	1	8.50196e-05	2.15251e-06	0.000473699	TK	2		splice_region_variant	Younger	0.0226	-	CS	GGC	non_cpg_transversion	2.1	FGFR3 Down Y 5xPCR	rs3135897	.	.	.	.	.	.	.	.
				chr4:1805751	c.1647G>T	p.G549G	1	1.61718e-05	4.09435e-07	9.01035e-05					Younger						1.1	FGFR3 Down Y Ad2
				chr4:1805751	c.1647G>T	p.G549G	1	5.73921e-05	1.45304e-06	0.000319768					Older						1.1	FGFR3 Down O Renato
			57	chr4:1805760	c.1656C>T	p.Y552Y	1	1.58589e-05	4.01513e-07	8.83602e-05	TK	2		synonymous_variant	Younger	3.23e-05	-	-	ACG	cpg_transition	1.2	FGFR3 Down Y Ad3	rs150083071	.	.	.	.	.	.	.	.
			58	chr4:1805768	c.1664T>A	p.V555E	1	3.91435e-05	9.91029e-07	0.000218094	TK	2		missense_variant	Older	-	-	-	GTG	non_cpg_transversion	1.1	FGFR3 Down O BAT	rs1254322699	0	D	0.988	D	0.972	D	5.080	3.23
			59	chr4:1805776	c.1672G>A	p.A558T	1	1.62248e-05	4.10777e-07	9.03989e-05	TK	2		missense_variant	Younger	4.05e-06	-	-	CGC	cpg_transition	1.2	FGFR3 Down Y Ad2	rs1349433800	0.023	D	0.967	D	0.492	P	5591	4.44
			60	chr4:1805777	c.1673C>T	p.A558V	1	1.84172e-05	4.66284e-07	0.000102614	TK	2		missense_variant	Younger	8.09e-06	-	-	GCG	cpg_transition	1.1	FGFR3 Down Y Ad2	rs1048418015	0.001	D	1	D	0.874	P	5147	3.6
			61	chr4:1805786	c.1682G>A	p.G561D	1	6.33513e-05	1.60392e-06	0.000352971	TK	2		missense_variant	Younger	-	-	-	GGT	non_cpg_transition	1.1	FGFR3 Down Y 5xPCR	-	0.001	D	1	D	0.994	D	5036	4.44
			62	chr4:1805806	c.1702C>A	p.R568R	1	1.51197e-05	3.82797e-07	8.42414e-05	TK	2		synonymous_variant	Younger	-	-	-	GCG	cpg_transversion	1.1	FGFR3 Down Y Ad3	-
			63	chr4:1805807	c.1703G>A	p.R568Q	1	1.51323e-05	3.83115e-07	8.43115e-05	TK	2		missense_variant	Younger	-	-	-	CGG	cpg_transition	1.1	FGFR3 Down Y Ad3	-	0.086	T	0.935	P	0.309	B	5778	4.44
			64	chr4:1805824	c.1720G>A	p.G574S	1	1.55214e-05	3.92969e-07	8.64799e-05	TK	2		missense_variant	Younger	-	-	-	GGG	non_cpg_transition	1.1	FGFR3 Down Y Ad2	-	0.113	T	0.999	D	0.997	D	4276	4.32
			65	chr4:1805854	c.1750C>T	p.P584S	1	1.51999e-05	3.84828e-07	8.46883e-05	TK	2		missense_variant	Younger	6.38e-05	-	-	GCC	non_cpg_transition	1.1	FGFR3 Down Y Ad3	rs759993319	0.772	T	0.003	B	0.039	B	0.509	3.47
			66	chr4:1805854	c.1750C>A	p.P584T	1	2.28212e-05	5.77782e-07	0.000127151	TK	2		missense_variant	Older	-	-	-	GCC	non_cpg_transversion	1.1	FGFR3 Down O 2Cap	-	0.568	T	0.006	B	0.037	B	0.671	3.47
			67	chr4:1805856	c.1752G>A	p.P584P	1	1.5527e-05	3.93109e-07	8.65108e-05	TK	2		synonymous_variant	Younger	5e-05	-	-	CGC	cpg_transition	1.1	FGFR3 Down Y Ad2	rs139020690	.	.	.	.	.	.	.	.
				chr4:1805856	c.1752G>A	p.P584P	1	1.51094e-05	3.82537e-07	8.41841e-05					Younger						2.1	FGFR3 Down Y Ad3
			68	chr4:1805873	c.1769C>T	p.T590I	1	6.23986e-05	1.5798e-06	0.000347663	TK	2		missense_variant	Younger	-	-	-	ACC	non_cpg_transition	1.1	FGFR3 Down Y 5xPCR	-	0.001	D	0.996	D	0.946	D	5665	4.32
			69	chr4:1805881	c.1777G>A	p.D593N	1	2.28045e-05	5.7736e-07	0.000127058	TK	2		missense_variant	Older	-	-	-	GGA	non_cpg_transition	1.1	FGFR3 Down O 2Cap	-	0.001	D	1	D	0.989	D	6028	4.32
			70	chr4:1806065	c.1851C>A	p.D617E	1	3.72107e-05	9.42093e-07	0.000207325	TK	2		missense_variant	Younger	-	-	-	ACC	non_cpg_transversion	1.1	FGFR3 Down Y Ad2	-	0	D	0.999	D	0.999	D	24959	3.33
			71	chr4:1806069	c.1855G>T	p.A619S	3	8.11074e-05	1.67263e-05	0.00023703	TK	2		missense_variant	Younger	-	-	-	GGC	non_cpg_transversion	2.1/2.4	FGFR3 Down Y Ad3	-	0	D	0.998	D	0.987	D	5.573	4.18
			72	chr4:1806073	c.1859C>T	p.A620V	1	3.71471e-05	9.40483e-07	0.00020697	TK	2		missense_variant	Younger	-	-	-	GCC	non_cpg_transition	1.1	FGFR3 Down Y Ad2	-	0	D	1	D	1	D	6064	4.18
			73	chr4:1806133	c.1919G>T	p.R640L	1	3.16156e-05	8.00437e-07	0.000176151	TK	2		missense_variant	Younger	-	-	-	CGG	cpg_transversion	1.2	FGFR3 Down Y Ad3	-	0	D	1	D	1	D	6124	4.35
			74	chr4:1806262	c.1965G>A	p.R655R	1	2.6786e-05	6.78162e-07	0.000149242	TK	2		synonymous_variant	Younger	4.01e-06	-	-	GGC	non_cpg_transition	1.1	FGFR3 Down Y Ad3	rs772373970	.	.	.	.	.	.	.	.
			75	chr4:1806302	c.2005C>G	p.R669G	1	2.79783e-05	7.08349e-07	0.000155885	TK	2		missense_variant	Younger	4.03e-06	-	-	CCG	cpg_transversion	1.1	FGFR3 Down Y Ad3	rs1490564667	0.001	D	0.997	D	0.962	D	5013	4.49
			Supplemental Table S1. FGFR3 exonic variants detected with DS. Variant position: genomic position of the variant on the GRCh38 assembly. CDS: nucleotide substitution on the coding sequence assuming transcript ENST00000440486.7. Amino Acid Substitution: amino acid subsitution assuming ENSP00000414914.2. n: number of detected variants within a library. VAF: variant allele frequency. CI: confidence …
