# Supplementary material for: Discovery of an unusually high number of de novo mutations in sperm of older men using duplex sequencing
Source: Genome Res. 2022 Mar;32(3):499–511. doi: 10.1101/gr.275695.121 (PMC8896467; doi:10.1101/gr.275695.121)
Supplement: Supplemental Material [file supp_gr.275695.121_Supplemental_Table_S2.xlsx]

## Sheet: Table S2
							Duplex Sequencing							ddPCR1/BEA2
			Variant ID	CDS	AA		Library	DCS Cvrg	n	VAF	CI Lower Limit	CI Upper Limit		Total molecules	n	VAF	CI Lower Limit	CI Upper Limit	Method
			chr4-1803713-G-A	c.952G>A	p.D318N		FGFR3 Up Y Oct19	11412	1	8.76271e-05	2.21853e-06	0.000488227		1.67682e+06	15.28	9.11251e-06	5.13149e-06	1.49623e-05	1
			chr4-1803713-G-A	c.952G>A	p.D318N		FGFR3 Down O 2Cap	20014	1	4.9965e-05	1.26501e-06	0.000278387		1.69714e+06	22.4	1.31987e-05	8.31034e-06	1.99099e-05	1
			chr4-1803761-G-A	c.1000G>A	p.A334T		FGFR3 Up O Oct19	8045	1	0.000124301	3.14702e-06	0.00069256		1.47518e+06	378.4	0.000256511	0.000231314	0.000283704	1
			chr4-1804372-A-G	c.1118A>G	p.Y373C		FGFR3 Down O Renato	9277	3	0.00032338	6.66888e-05	0.000945055		701634	78	0.000111169	8.78745e-05	0.000138744	2
			chr4-1804392-G-A	c.1138G>A	p.G380R		FGFR3 Down O BAT	6391	1	0.00015647	3.96148e-06	0.000871795		402545	28	6.95574e-05	4.62204e-05	0.00010053	2
			chr4-1804392-G-A	c.1138G>A	p.G380R		FGFR3 Down O Renato	8790	1	0.000113766	2.8803e-06	0.000633862		281760	10	3.54912e-05	1.70194e-05	6.52696e-05	2
			chr4-1804516-G-A	c.1262G>A	p.R421Q		FGFR3 Down Y Ad2	45305	1	2.20726e-05	5.5883e-07	0.000122981		1.50409e+06	7.68	5.10609e-06	2.15852e-06	1.01965e-05	1
				c.1262G>A	p.R421Q		FGFR3 Down O BAT	19931	1	5.01731e-05	1.27027e-06	0.000279547		1.23905e+06	11.92	9.62026e-06	4.95812e-06	1.68352e-05	1
			chr4-1805644-C-A	c.1620C>A	p.N540K		FGFR3 Down Y Ad2	64874	1	1.54145e-05	3.90261e-07	8.58841e-05		1.54745e+06	14.08	9.09882e-06	4.98426e-06	1.52444e-05	1
			chr4-1805644-C-A	c.1620C>A	p.N540K		FGFR3 Down O 2Cap	44819	1	2.2312e-05	5.6489e-07	0.000124314		1.61459e+06	27.92	1.72923e-05	1.14832e-05	2.50052e-05	1
			chr4-1806093-G-A	c.1879G>A	p.E627K		FGFR3 Down O 2Cap	24588	1	4.06702e-05	1.02968e-06	0.0002266		1.45139e+06	34.32	2.36462e-05	1.64064e-05	3.29922e-05	1
			Supplemental Table S2. Comparison between ultra-sensistive detection methods. Seven variants detected with DS were measured with ddPCR (1) or BEA (2). DCS Cvrg: Duplex Consensus Sequences obtained for each position. Total molecules: sum of molecules analyzed accross the 5 individuals present in the DS pool. n: number of detected variants within a library (for DS) or sum of variants detected accro…
