# Supplementary material for: Discovery of an unusually high number of de novo mutations in sperm of older men using duplex sequencing
Source: Genome Res. 2022 Mar;32(3):499–511. doi: 10.1101/gr.275695.121 (PMC8896467; doi:10.1101/gr.275695.121)
Supplement: Supplemental Material [file supp_gr.275695.121_Supplemental_Table_S3.xlsx]

## Sheet: Table S3
			Library	Donor Pool	Age Category	Input DNA (ng)	FGFR3 Region	Adapter	Extensions	PCR1	PCR2	PCR3	3rd Capture	PCR4
			FGFR3 Down O BAT	O1	Older	5000	Down 1-5	Duplex	-	5	16	12	No	-
			FGFR3 Down O Babsi	O2	Older	5000	Down 1-5	Duplex	-	5	16	12	No	-
			FGFR3 Down O Renato	O2	Older	5000	Down 1-5	Duplex	-	7	16	12	No	-
			FGFR3 Down Y Ad2	Y1	Younger	3750	Down 1-5	2	12	5	5	5	Yes	16
			FGFR3 Down Y Ad3	Y1	Younger	3750	Down 1-5	3	12	5	5	5	Yes	16
			FGFR3 Down Y 5xPCR	Y1	Younger	500	Down 1-5	2	-	5	12	10	No	-
			FGFR3 Down Y 12xExt5xPCR	Y1	Younger	500	Down 1-5	2	12	5	12	10	No	-
			FGFR3 Down O 2Cap	O3	Older	500	Down 1-5	2	12	5	12	12	No	-
			FGFR3 Up Y Aug19	Y2	Younger	500	Up 1-5	2	12	5	12	10	No	-
			FGFR3 Up O Oct19 Re-seq	O3	Older	500	Up 1-5	2	12	5	12	12	No	-
			FGFR3 Up O Oct19	O3	Older	500	Up 1-5	2	12	5	12	11	No	-
			FGFR3 Up Y Oct19	Y2	Younger	500	Up 1-5	2	12	5	12	11	No	-
			FGFR3 Y C 1:10	C	Younger	500	Up 3-5; Down 4	2	12	5	12	12	No	-
			FGFR3 Y C 1:100	C	Younger	500	Up 3-5; Down 4	2	12	5	12	12	No	-
			FGFR3 Y C 1:1000	C	Younger	500	Up 3-5; Down 4	2	12	5	12	12	No	-
			FGFR3 Y C 1:10000	C	Younger	500	Up 3-5; Down 4	2	12	5	12	12	No	-
			Supplemental Table S3. Overview of the differences between each library preparation. Donors details are shown in Supplemental Table S4.
														\
