# Supplementary material for: Discovery of an unusually high number of de novo mutations in sperm of older men using duplex sequencing
Source: Genome Res. 2022 Mar;32(3):499–511. doi: 10.1101/gr.275695.121 (PMC8896467; doi:10.1101/gr.275695.121)
Supplement: Supplemental Material [file supp_gr.275695.121_Supplemental_Table_S4.xlsx]

## Sheet: Table S4
			Pool	ID	Age	Country	Diagnosis	Volume (mL)	Million of sperms (MS)	MS/mL	Libraries
			Y1	1026	30	Austria	N/A	2.4	156	65	FGFR3 Down Y Ad2
				1178	29	Austria	Normozoospermia	7.2	101	14.03	FGFR3 Down Y Ad3
				1327	27	Austria	Normozoospermia	2	240	120	FGFR3 Down Y 5xPCR
				1441	27	Austria	Normozoospermia	5	120	24	FGFR3 Down Y 12xExt5xPCR
				1233	29	Austria	Normozoospermia	5.5	72	13.09
			Y2	1315	26	Austria	Normozoospermia	5.5	42	7.64
				1333	29	Austria	Normozoospermia	6	115	19.17	FGFR3 Up Y Aug19
				1350	28	Austria	Normozoospermia	3.6	105	29.17	FGFR3 Up Y Oct19
				1385	26	Austria	Normozoospermia	5	120	24
				1392	27	Austria	Normozoospermia	3.2	64	20
			O1	1264	56	Austria	Normozoospermia	2.4	120	50
				1567	54	Morocco	Normozoospermia	3.3	18	5.45
				1586	52	Austria	Normozoospermia	4	75	18.75	FGFR3 Down O BAT
				1657	55	Austria	Normozoospermia	3.4	50	14.71
				1780	59	Austria	Normozoospermia	2.3	150	65.22
			O2	1133	55	Austria	Normozoospermia	1.2	120	100
				1368	51	Bosnia and Herzegovina	Normozoospermia	2.2	76	34.55	FGFR3 Down O Babsi
				1425	50	Austria	Normozoospermia	2	52	26	FGFR3 Down O Renato
				1639	49	Austria	Normozoospermia	3	110	36.67
				1713	51	Austria	Normozoospermia	1.8	110	61.11
			O3	1133	55	Austria	Normozoospermia	1.2	120	100
				1264	56	Austria	Normozoospermia	2.4	120	50	FGFR3 Down O 2Cap
				1407	49	Austria	Normozoospermia	3	76	25.33	FGFR3 Up O Oct19 Re-seq
				1639	49	Austria	Normozoospermia	3	110	36.67	FGFR3 Up O Oct19
				1780	59	Austria	Normozoospermia	2.3	150	65.22
			C	1350	28	Austria	Normozoospermia	3.6	105	29.17	FGFR3 Y C 1:10
				FGFR3 c.742C>T	-	-	-	-	-	-	FGFR3 Y C 1:100
				FGFR3 c.746C>G	-	-	-	-	-	-	FGFR3 Y C 1:1000
				FGFR3 c.749C>G	-	-	-	-	-	-	FGFR3 Y C 1:10000
				FGFR3 c.1620C>A	-	-	-	-	-	-
			Supplemental Table S4. Detailed donor pools. On pool C, samples positive for variants c.742C>T, c.746C>G, c.749C>G, and c.1620C>A were used at 1:10, 1:100, 1:1000, and 1:10000 ratios on libraries "FGFR3 Y C 1:10", "FGFR3 Y C 1:100", "FGFR3 Y C 1:1000", "FGFR3 Y C 1:10,000", respectively.
