# Supplementary material for: Discovery of an unusually high number of de novo mutations in sperm of older men using duplex sequencing
Source: Genome Res. 2022 Mar;32(3):499–511. doi: 10.1101/gr.275695.121 (PMC8896467; doi:10.1101/gr.275695.121)
Supplement: Supplemental Material [file supp_gr.275695.121_Supplemental_Table_S5.xlsx]

## Sheet: Table S5
				Tier	Criteria
				1.1	both ab and ba SSCS present (>75% of the sites with alternative base) and minimal FS>=3 for both SSCS in at least one mate
				1.2	both ab and ba SSCS present (>75% of the sites with alt. base) and mate pair validation (min. FS=1) and minimal FS>=3 for at least one of the SSCS
				2.1	both ab and ba SSCS present (>75% of the sites with alt. base) and minimal FS>=3 for at least one of the SSCS in at least one mate
				2.2	both ab and ba SSCS present (>75% of the sites with alt. base) and mate pair validation (min. FS=1)
				2.3	both ab and ba SSCS present (>75% of the sites with alt. base) and minimal FS=1 for both SSCS in one mate and minimal FS>=3 for at least one of the SSCS in the other mate
				2.4	both ab and ba SSCS present (>75% of the sites with alt. base) and minimal FS=1 for both SSCS in at least one mate
				3.1	both ab and ba SSCS present (>50% of the sites with alt. base) and recurring mutation on this position
				3.2	both ab and ba SSCS present (>50% of the sites with alt. base) and minimal FS>=1 for both SSCS in at least one mate
				4.1	variants at the start or end of the DCS (median position of the variant within the PE-reads forming the DCS)
				4.2	remaining variants
				Supplemental Table S5. Definition of the tier system in the Variant Analyzer tool. Reads originated from the forward strand of the original DNA molecule (ab); Reads originated from the reverse strand of the original DNA molecule (ba); Single stranded consensus sequences (SSCS); Duplex consensus sequences (DCS); Family size (FS); Paired-end (PE).
