# Supplementary material for: Discovery of an unusually high number of de novo mutations in sperm of older men using duplex sequencing
Source: Genome Res. 2022 Mar;32(3):499–511. doi: 10.1101/gr.275695.121 (PMC8896467; doi:10.1101/gr.275695.121)
Supplement: Supplemental Material [file supp_gr.275695.121_Supplemental_Table_S6.xlsx]

## Sheet: Table S6
		Younger
		Region	nsyn	syn	dN/dS	reference median	lower	upper
		IgI-III + inter-domains	12	6	0.606897	0.790295	0.243168	2.43168
		TM + inter-domains	8	2	1.29213	0.709239	0.164645	1.21584
		TK	15	9	0.478094	0.506599	0.217114	1.5198
		total	35	17	0.625799	0.574146	0.328277	0.965072
		Older
		Region	nsyn	syn	dN/dS	reference median	lower	upper
		IgI-III + inter-domains	13	5	0.788965	0.477651	0.243168	1.06386
		TM + inter-domains	6	2	0.969101	0.911879	0.221891	2.12772
		TK	7	2	1.004	1.06386	0.243168	2.43168
		total	26	9	0.878106	0.663185	0.40528	1.21584
		Younger + Older
		Region	nsyn	syn	dN/dS	reference median	lower	upper
		IgI-III + inter-domains	25	11	0.689655	0.607919	0.33972	1.16644
		TM + inter-domains	14	4	1.13062	0.607919	0.243168	1.99853
		TK	22	11	0.573712	0.607919	0.28608	1.25438
		total	61	26	0.713136	0.522431	0.341028	0.75382
		Supplemental Table S6. dN/dS analysis. The numbers of nonsynonyous (nsyn) and synonymous (syn) mutations are shown for the different domains separately, as well as for all domains combined (total). dN/dS ratios were calculated for younger or older donors separately, as well as for both age groups combined. Reference median refers to the median expected dN/dS ratio when the observed mutation spect…
