# Supplementary material for: Discovery of an unusually high number of de novo mutations in sperm of older men using duplex sequencing
Source: Genome Res. 2022 Mar;32(3):499–511. doi: 10.1101/gr.275695.121 (PMC8896467; doi:10.1101/gr.275695.121)
Supplement: Supplemental Material [file supp_gr.275695.121_Supplemental_Table_S7.xlsx]

## Sheet: Table S7
	query	reference	cosine similarity	expected cosine similarity	lower CI	upper CI
	all	COSMIC	0.928116	0.977439	0.938865	0.994528
	all	gnomAD	0.874276	0.979347	0.942935	0.995677
	Younger	COSMIC	0.928501	0.965592	0.910357	0.991084
	Younger	gnomAD	0.88002	0.968887	0.914766	0.992828
	Older	COSMIC	0.875836	0.939027	0.84348	0.985883
	Older	gnomAD	0.813327	0.942292	0.825978	0.988175
	all	Younger	0.992054	0.978995	0.944067	0.997008
	all	Older	0.961851	0.970607	0.929205	0.993229
	Younger	Older	0.919789	0.955261	0.892444	0.988467
	IgI_II_III	TM_Inter-domain	0.952	0.9398	0.8501	0.9867
	IgI_II_III	TK	0.9477	0.9467	0.8701	0.99
	TM_Inter-domain	TK	0.963	0.8975	0.757	0.9782
	IgI_II_III	COSMIC	0.8981	0.9494	0.8592	0.9881
	IgI_II_III	gnomAD	0.8369	0.9541	0.8721	0.9901
	TM_Inter-domain	COSMIC	0.8963	0.899	0.7493	0.9732
	TM_Inter-domain	gnomAD	0.8498	0.9072	0.7331	0.9778
	TK	COSMIC	0.9414	0.9406	0.8467	0.985
	TK	gnomAD	0.8947	0.9472	0.8545	0.9885
	COSMIC	gnomAD	0.984762	0.996205	0.989521	0.999178
	Supplemental Table S7. Cosine similarity between a query and a reference spectra. All variants except for indels are downloaded from the databases COSMIC v94 and gnomAD v3.1.1. The expected cosine similarity is calculated by bootstrapping as described in Abascal et al., 2021. The confidence intervals (CI) of the expected cosine similarity of the reference spectra are included. All comparison are …
