# Supplementary material for: Discovery of an unusually high number of de novo mutations in sperm of older men using duplex sequencing
Source: Genome Res. 2022 Mar;32(3):499–511. doi: 10.1101/gr.275695.121 (PMC8896467; doi:10.1101/gr.275695.121)
Supplement: Supplemental Material [file supp_gr.275695.121_Supplemental_Table_S8.xlsx]

## Sheet: Table S8
				A	Upstream FGFR3 Regions
					Item	Quantity	NEB Catalog #	Incubation
					Human Sperm DNA	500-5000 ng	-	Incubate overnight at 37 °C
					CutSmart Buffer (10×)	1×	-
					PstI-HF	10U	R3140
					BstEII-HF	10U	R3162
					XcmI	10U	R0533
					dH2O	add up to 100 µL	-
				B	Downstream FGFR3 Regions
					Item	Quantity	NEB Catalog #	Incubation
					Human Sperm DNA	500-5000 ng	-	Incubate overnight at 37 °C
					CutSmart Buffer (10×)	1×	-
					BamHI-HF	10U	R3136
					XbaI	10U	R0145
					BsaI	10U	R0535
					AvrII	10U	R0174
					EciI	10U	R0590
					ScaI-HF	10U	R3122
					PvuII-HF	10U	R3151
					BstAPI	10U	R0654
					dH2O	add up to 100 µL	-
					EcoNI	10U		Add in the morning. 1 hour at 37 °C
				Supplemental Table S8. Targeted Enzymatic Fragmentation Protocol. (A) Enzyme mix and incubation instructions to obtain 5 fragments within the chr4:1799008-1804051 interval. (B) Enzyme mix and incubation instructions to obtain 5 fragments within the interval chr4:1803617-1806393. All enzymes were purchased from New England Biolabs (NEB).
