# Supplementary material for: Discovery of an unusually high number of de novo mutations in sperm of older men using duplex sequencing
Source: Genome Res. 2022 Mar;32(3):499–511. doi: 10.1101/gr.275695.121 (PMC8896467; doi:10.1101/gr.275695.121)
Supplement: Supplemental Material [file supp_gr.275695.121_Supplemental_Table_S9.xlsx]

## Sheet: Table S9
					PCR 1	PCR 2-4				Single Primer Extensions Program					PCR Program
				DNA	20	46					℃	Time	Cycles			℃	Time	Cycles
				NEBNext Universal (20 µM)1	1	2				Initial Denaturation	95	4 min			Initial Denaturation	95	4 min
				NEB_mws20 (20 µM)	1	2				Denaturation	98	20 sec			Denaturation	98	20 sec	See Supplemental Table S3
				2x kapa HiFi Reaction Mix	25	50				Annealing	65	20 sec	x12		Annealing	65	20 sec
				dH2O	3	-				Extension	72	45 sec			Extension	72	30 sec
					50	100				Final Extention	72	5 min			Final Extention	72	3 min
				1 Add after single primer extensions reaction
				Supplemental Table S9. Single Primer Extension and PCR protocol. For the last PCR reaction, instead of using NEB_mws20 primer, NEBNext Index primer for Illumina was used. Libraries "FGFR3 Down O BAT", "FGFR3 Down O Babsi", and "FGFR3 Down O Renato" used primers mws13 and mws20 instead of NEBNext Universal and NEB_mws20, respectively.
