# Supplementary material for: Discovery of an unusually high number of de novo mutations in sperm of older men using duplex sequencing
Source: Genome Res. 2022 Mar;32(3):499–511. doi: 10.1101/gr.275695.121 (PMC8896467; doi:10.1101/gr.275695.121)
Supplement: Supplemental Material [file supp_gr.275695.121_Supplemental_Table_S10.xlsx]

## Sheet: Table S10
					Extension and PCR Oligos
					Name	5'- Sequence -3'
					mws13	AATGATACGGCGACCACCGAG
					mws20	GTGACTGGAGTTCAGACGTGTGC
					mws211	CAAGCAGAAGACGGCATACGAGATXXXXXXGTGACTGGAGTTCAGACGTGTGC
					NEBNext Universal	AATGATACGGCGACCACCGAGATCTACACTCTTTCCCTACACGACGCTCTTCCGATC*T
					NEB_mws20	GTGACTGGAGTTCAGACGTGTGCTCTTCCGATC*T
					NEBNext Index primer for Illumina 1,2	CAAGCAGAAGACGGCATACGAGATXXXXXXGTGACTGGAGTTCAGACGTGTGCTCTTCCGATC*T
					1 XXXXXX represents a 6 bp barcode sequence for multiplexing
					2 From NEBNext® Multiplex Oligos for Illumina®, New England Biolabs
					Supplemental Table S10. Extension and PCR oligonucleotides. Single primer extensions were done using primer NEB_mws20. PCR reactions were executed with NEBNext Universal and NEB_mws20 primers, except for libraries "FGFR3 Down O BAT", "FGFR3 Down O Babsi", and "FGFR3 Down O Renato" which used primers mws13 and mws20. Primers mws21 and NEBNext Index primer for Illumina replaced primers mws20 and NE…
