# Supplementary material for: Discovery of an unusually high number of de novo mutations in sperm of older men using duplex sequencing
Source: Genome Res. 2022 Mar;32(3):499–511. doi: 10.1101/gr.275695.121 (PMC8896467; doi:10.1101/gr.275695.121)
Supplement: Supplemental Material [file supp_gr.275695.121_Supplemental_Table_S11.xlsx]

## Sheet: Table S11
				Capture Oligos
				Name	5'- Sequence -3'	Target Region
				FGFR3_CRISPR_1_Bio	/5BiosG/TTCCACTGCTGTGTCTGTAAACGGTGCCGGGTTTGGGGGTGCCTGCCTCATGGTTGCCCATCTTCCCCACAGAAGT	Up 1
				FGFR3_CRISPR_2_Bio	/5BiosG/TTGGGCATTGGTTGCGGCCATCTCTGCCTTGCAGACGCTCCATCCTCGGGAGATGACGAAGACGGGGAGGA	Up 2
				FGFR3_CRISPR_3_Bio	/5BiosG/AACTACACCTGCGTCGTGGAGAACAAGTTTGGCAGCATCCGGCAGACGTACACGCTGGACGTGCTGGGTGA	Up 3
				FGFR3_CRISPR_4_Bio	/5BiosG/AGCGACGTGGAGTTCCACTGCAAGGTGTACAGTGACGCACAGCCCCACATCCAGTGGCTCAAGCACGTGGAGGTGAA	Up 4
				FGFR3_CRISPR_5_Bio	/5BiosG/CGCTAACACCACCGACAAGGAGCTAGAGGTTCTCTCCTTGCACAACGTCACCTTTGAGGACGCCGGGGAGTACA	Up 5
				Reg_1_Bio	/5BiosG/TCCCGCTTCTTGAGCCCTCACTCCTGGCCCTGTGCCCAGTGTGGGGACAAAGTTGGCCTGGCCCGGTCCTGGTCCCAGA	Down 1
				Reg_2_ACH_Bio	/5BiosG/AAGATCTCCCGCTTCCCGCTCAAGCGACAGGTAACAGAAAGTAGATACCAGGTTCTGAGCTGCCTGCCCGCCAGGCCTCCTGGAGCC	Down 2
				Reg_3_Bio	/5BiosG/CTTTGGGGCACGAAACATTCTAAAAATCTTCATTCAATGCTGGTGGAAGTCAGAACGCCCCCCCTTCTGGCCCAGCACTGACCC	Down 3
				Reg_4_Bio	/5BiosG/GCTCCGTGCACAGACGATGCCACTGACAAGGACCTGTCGGACCTGGTGTCTGAGATGGAGATGATGAAGATGATCGGGAAACACAAAAAC	Down 4
				Reg_5_TDII_Bio	/5BiosG/CGAGTCTACACTCACCAGAGTGACGTGTACGTGTCCTGCAGAGCTCAGGCTTCAGGGGTGGAGGCGGGAACTGGGCAGAGCCAGGAC	Down 5
				mws60	AATGATACGGCGACCACCGAGATCTACACTCTTTCCCTACACGACGCTCTTCCGATCTIIIIIIIIIIIITGACT	-
				mws61	GTCAIIIIIIIIIIIIAGATCGGAAGAGCACACGTCTGAACTCCAGTCAC	-
				Supplemental Table S11. Oligonucleotides used for hybridization captures. Five oligos target regions up 1-5 and 5 target regions down 1-5. Mws60 and mws61 are blocking oligonucleotides.
