# Supplementary material for: Discovery of an unusually high number of de novo mutations in sperm of older men using duplex sequencing
Source: Genome Res. 2022 Mar;32(3):499–511. doi: 10.1101/gr.275695.121 (PMC8896467; doi:10.1101/gr.275695.121)
Supplement: Supplemental Material [file supp_gr.275695.121_Supplemental_Table_S13.xlsx]

## Sheet: Table S13
				Target Site	CDS	AA	FGFR3 domain	Probe ID	Assay Name	Tm (ᵒC)
				chr4-1803713-G-A	c.952G>A	p.D318N	Ig-III	dHsaMDS391045794	FGFR3 p.D318N	53
				chr4-1803761-G-A	c.1000G>A	p.A334T	Ig-III	dHsaMDS168624904	FGFR3 c.1000G>A	53
				chr4-1804426-C-A	c.1172C>A	p.A391E	TM	dHsaMDS2514736	FGFR3 p.A391E	55
				chr4-1804516-G-A	c.1262G>A	p.R421Q	-	dHsaMDS956049639	FGFR3 p.R421Q	53.7
				chr4-1805561-G-A	c.1537G>A	p.D513N	TK	dHsaMDS844153602	FGFR3 c.1537G>A	55
				chr4-1805644-C-A	c.1620C>A	p.N540K	TK	dHsaMDS162559501	FGFR3 c.1620C>A	55
				chr4-1806076-G-T	c.1862G>T	p.R621L	TK	dHsaMDS190220612	FGFR3 c.1862G>T	55
				chr4-1806093-G-A	c.1879G>A	p.E627K	TK	dHsaMDS454608136	FGFR3 p.E627K	53
				Supplemental Table S13. Target sites of ddPCR probes and assay conditions.
