# Supplementary material for: Discovery of an unusually high number of de novo mutations in sperm of older men using duplex sequencing
Source: Genome Res. 2022 Mar;32(3):499–511. doi: 10.1101/gr.275695.121 (PMC8896467; doi:10.1101/gr.275695.121)
Supplement: Supplemental Material [file supp_gr.275695.121_Supplemental_Table_S14.xlsx]

## Sheet: Table S14
	variant ID	cvrg	AC alt (all tiers)	AF (all tiers)	cvrg (tiers 1.1-2.4)	AC alt (tiers 1.1-2.4)	AF (tiers 1.1-2.4)	AC alt (Du Novo)	AF (Du Novo)	tier 1.1	tier 1.2	tier 2.1	tier 2.2	tier 2.3	tier 2.4	tier 3.1	tier 3.2	tier 4.1	tier 4.2	AF 1.1-1.2	AF 1.1-2.1	AF 1.1-2.2	AF 1.1-2.3	AF 1.1-2.4	AF 1.1-3.1	AF 1.1-3.2	AF 1.1-4.1	AF 1.1-4.2
	chr4-1803672-G-T	20291	1	4.92829e-05	20291	1	4.92829e-05	1	4.92829e-05	0	0	1	0	0	0	0	0	0	0	0	4.92829e-05	4.92829e-05	4.92829e-05	4.92829e-05	4.92829e-05	4.92829e-05	4.92829e-05	4.92829e-05
	chr4-1803701-G-A	20222	1	4.94511e-05	20222	1	4.94511e-05	1	4.94511e-05	1	0	0	0	0	0	0	0	0	0	4.94511e-05	4.94511e-05	4.94511e-05	4.94511e-05	4.94511e-05	4.94511e-05	4.94511e-05	4.94511e-05	4.94511e-05
	chr4-1803707-A-T	20142	1	4.96475e-05	20142	1	4.96475e-05	1	4.96475e-05	1	0	0	0	0	0	0	0	0	0	4.96475e-05	4.96475e-05	4.96475e-05	4.96475e-05	4.96475e-05	4.96475e-05	4.96475e-05	4.96475e-05	4.96475e-05
	chr4-1803713-G-A	20012	1	4.997e-05	20012	1	4.997e-05	1	4.997e-05	1	0	0	0	0	0	0	0	0	0	4.997e-05	4.997e-05	4.997e-05	4.997e-05	4.997e-05	4.997e-05	4.997e-05	4.997e-05	4.997e-05
	chr4-1803735-C-A	20208	2	9.89707e-05	20206	0	0	2	9.89707e-05	0	0	0	0	0	0	0	0	2	0	0	0	0	0	0	0	0	9.89707e-05	9.89707e-05
	chr4-1803798-G-T	18007	1	5.5534e-05	18007	1	5.5534e-05	1	5.5534e-05	1	0	0	0	0	0	0	0	0	0	5.5534e-05	5.5534e-05	5.5534e-05	5.5534e-05	5.5534e-05	5.5534e-05	5.5534e-05	5.5534e-05	5.5534e-05
	chr4-1803861-G-T	6588	1	0.000151791	6588	1	0.000151791	1	0.000151791	1	0	0	0	0	0	0	0	0	0	0.000151791	0.000151791	0.000151791	0.000151791	0.000151791	0.000151791	0.000151791	0.000151791	0.000151791
	chr4-1804278-A-T	23289	1	4.29387e-05	23288	0	0	1	4.29387e-05	0	0	0	0	0	0	0	1	0	0	0	0	0	0	0	0	4.29387e-05	4.29387e-05	4.29387e-05
	chr4-1804288-G-C	18105	2	0.000110467	18105	2	0.000110467	2	0.000110467	0	0	1	0	0	1	0	0	0	0	0	5.52334e-05	5.52334e-05	5.52334e-05	0.000110467	0.000110467	0.000110467	0.000110467	0.000110467
	chr4-1804314-G-A	13277	1173	0.0883483	13234	1130	0.0853861	1173	0.0883483	352	2	560	0	0	216	8	0	17	18	0.0266626	0.0688409	0.0688409	0.0688409	0.0851096	0.0857121	0.0857121	0.0869925	0.0883483
	Supplemental Table S14. Example of partial Variant Analyzer output (Allele Frequencies tab). Variant ID includes the cromossome, nucleotide coordinates and nucleotide substitution; cvrg shows the DCS coverage for each variant position; AC alt shows the allele counts of mutated alleles; AF shows the allele frequency of mutants; each tier shows the number of mutants called.
